# Supplementary material for: Stabilising the orthorhombic perovskite structure in SrIrO3 through chemical doping. Synthesis, structure and magnetic properties of SrIr1−xMgxO3(0.20 ≤ x ≤ 0.33)
Source: Royal Society of Chemistry journal article supplement (doi:10.1039/c3ta12326j), 2013-01-01
Supplement: c3ta12326j.pdf [file c3ta12326j.pdf]

**Stabilising the Orthorhombic Perovskite Structure in SrIrO<sub>3</sub> through Chemical Doping. Synthesis, Structure and Magnetic Properties of SrIr<sub>1-x</sub>Mg<sub>x</sub>O<sub>3</sub>.**

Ilyas Qasim and Brendan J. Kennedy\*

School of Chemistry, the University of Sydney, Sydney, NSW 2006 Australia

Maxim Avdeev

Australian Nuclear Science and Technology Organisation, Lucas Heights, NSW  
2234, Australia

Supplementary information:

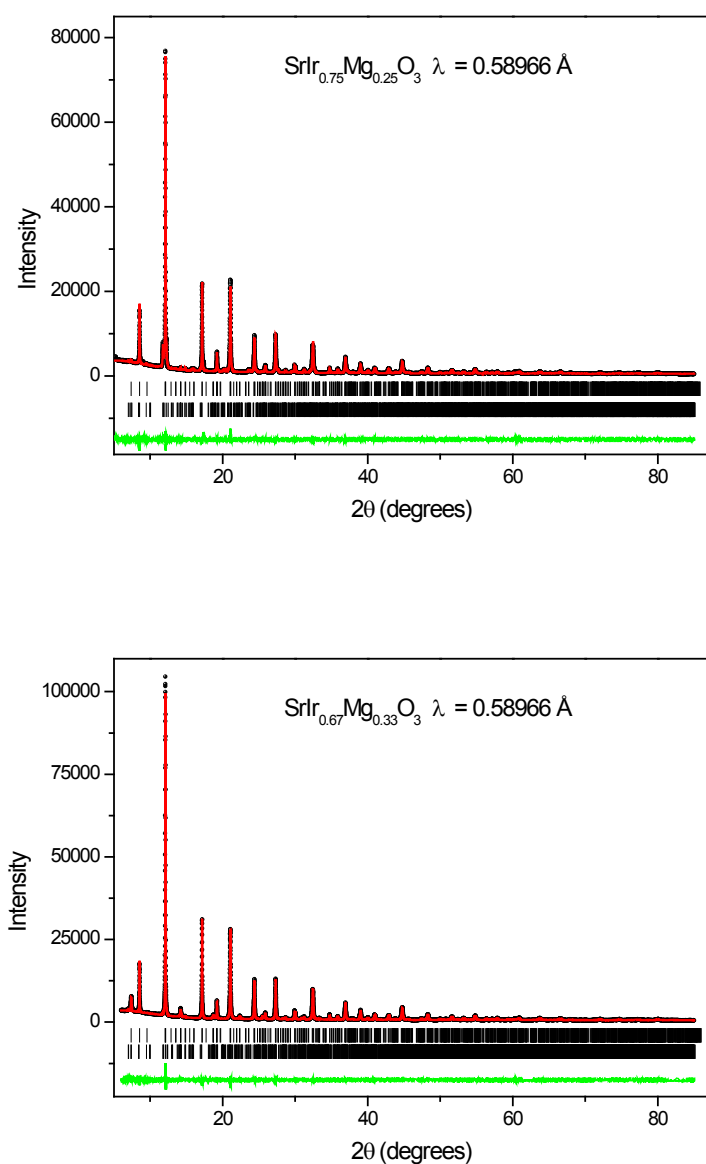

Figure 1. Observed, calculated and difference SXRD pattern for  $\text{SrIr}_{0.75}\text{Mg}_{0.25}\text{O}_3$  and  $\text{SrIr}_{0.67}\text{Mg}_{0.33}\text{O}_3$  measured at room temperature. The upper set of markers are from the orthorhombic *Pnma* phase and the lower set of markers are due to the poorly crystalline 6H- $\text{SrIrO}_3$  type material.

| Atom | <i>x</i>   | <i>y</i>   | <i>z</i>  | $B_{\text{iso}}(\text{\AA}^2)$ | N    |
|------|------------|------------|-----------|--------------------------------|------|
| Sr   | 0.0253(2)  | 0.5041(12) | 0.25      | 1.10(1)                        | 1    |
| Mg   | 0          | 0          | 0         | 0.65(0)                        | 0.33 |
| Ir   | 0          | 0          | 0         | 0.65(0)                        | 0.66 |
| O1   | 0.1388(16) | 0.0019(84) | 0.25      | 1.50(12)                       | 1    |
| O2   | 0.2768(22) | 0.2379(29) | 0.0055(9) | 1.50(12)                       | 1    |

Table S1. Refined structural parameters for  $\text{SrIr}_{0.67}\text{Mg}_{0.33}\text{O}_3$  from synchrotron X-ray diffraction data.  $a = 5.59782(11)$   $b = 5.57185(11)$   $c = 7.89182(18)\text{\AA}$

$R_p$  6.03  $R_{wp}$  8.67  $R_{exp}$  GOF 9.50  $R_{Bragg}$  10.85

| Atom | <i>x</i>    | <i>y</i>    | <i>z</i>   | Biso    | N    |
|------|-------------|-------------|------------|---------|------|
| Sr   | 0.0012(10)  | 0.5061(7)   | 0.25       | 1.37(1) | 1.0  |
| Mg   | 0           | 0           | 0          | 0.68(1) | 0.25 |
| Ir   | 0           | 0           | 0          | 0.68(1) | 0.75 |
| O1   | -0.1605(18) | -0.0843(21) | 0.25       | 0.22(8) | 1.0  |
| O2   | 0.2193(15)  | 0.2794(16)  | 0.0238(11) | 0.22(8) | 1.0  |

Table S1. Refined structural parameters for  $\text{SrIr}_{0.75}\text{Mg}_{0.25}\text{O}_3$  from synchrotron X-ray diffraction data.  $a = 5.59811(9)$   $b = 5.56910(9)$   $c = 7.89056(15)\text{\AA}$

$R_p$  4.46  $R_{wp}$  6.58  $R_{exp}$  GOF 5.41  $R_{Bragg}$  6.16

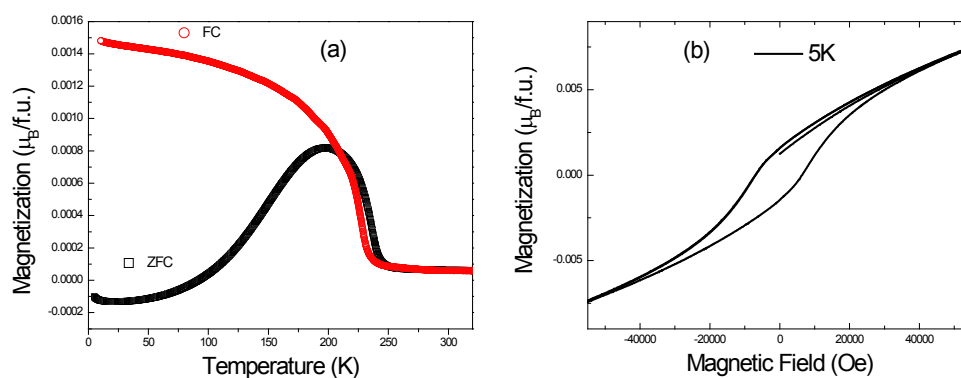

Figure 2. (a) Temperature dependence of magnetization for  $\text{SrIr}_{0.75}\text{Mg}_{0.25}\text{O}_3$  samples recorded with an applied magnetic field of 1000 Oe (b) the hysteresis loop at 5 K.

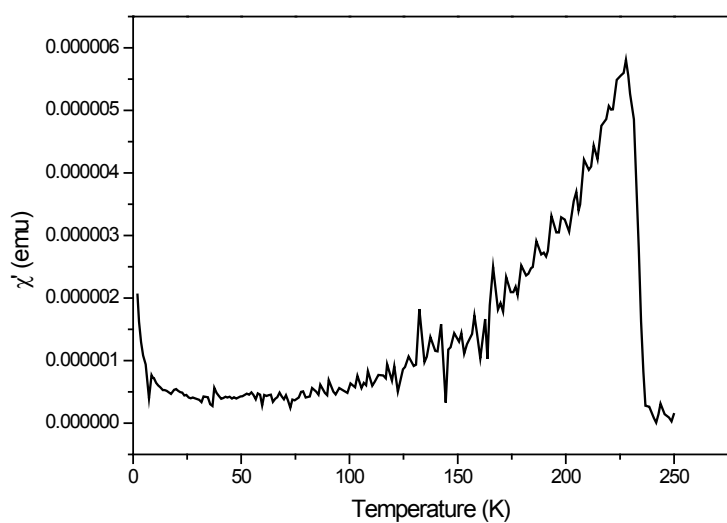

Figure S3. Temperature dependence of real part of ac susceptibility for  $\text{SrIr}_{0.67}\text{Mg}_{0.33}\text{O}_3$  measured at 1000 Hz.

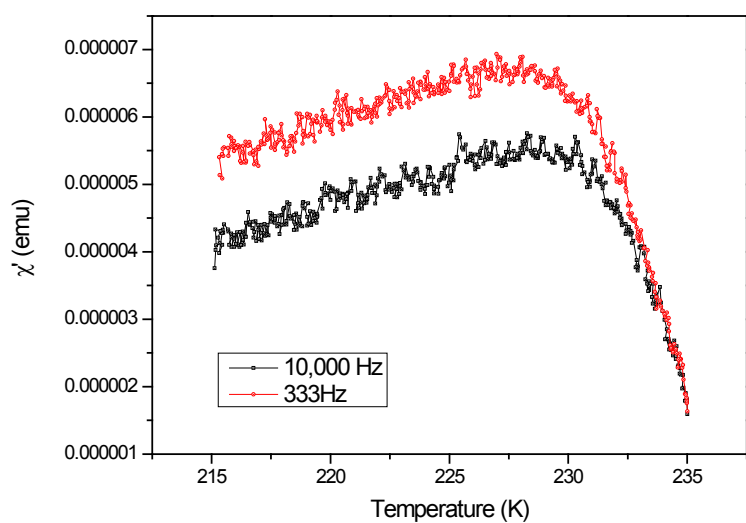

Figure S4. Temperature dependence of real part of ac susceptibility for  $\text{SrIr}_{0.67}\text{Mg}_{0.33}\text{O}_3$  measured at different frequencies.
